# Supplementary material
Source: publisher figshare collection journal article supplement (https://karger.figshare.com/ndownloader/files/27775263)
Supplement: Supplementary file 1 [file 27775263]

**Supplementary Table 4: Area under the receiver operator characteristic curve (AUROC) values for absolute and relative MR parameters in the prediction of adenohypophyseal tumour functional status**

*GH = somatotropinoma; NFG= non - functioning gonadotropinoma; PRL=macroprolactinoma; SI= signal intensity.*

|  | **AUROC**  **(95% confidence interval)** | | | | |
| --- | --- | --- | --- | --- | --- |
|  | **NFG vs GH** | **NFG vs PRL** | **GH vs PRL** |  | **NFG vs Functioning (GH/PRL)** |
| **Tumour volume (cm3)** | 0.80  (0.70 - 0.90) | 0.64  (0.47 - 0.82) | 0.86  (0.76 – 0.96) |  | 0.67  (0.57 – 0.78) |
| **Knosp grade** | 0.76  (0.66 - 0.87) | 0.67  (0.52 – 0.83) | 0.85  (0.75 -0.95) |  | 0.63  (0.53 – 0.74) |
| **Tumour/WM**  **T2W SI ratio** | 0.90  (0.83 - 0.96) | 0.58  (0.42 – 0.73) | 0.86  (0.76 – 0.97) |  | 0.80  (0.72 – 0.88) |
| **Tumour/WM**  **T1W SI ratio** | 0.56  (0.45 - 0.67) | 0.60  (0.47 – 0.72) | 0.68  (0.53 – 0.82) |  | 0.52  (0.41 – 0.62) |
| **Tumour/CSF**  **T2W SI ratio** | 0.91  (0.86 - 0.97) | 0.58  (0.39 – 0.78) | 0.79  (0.65 – 0.93) |  | 0.82  (0.73 – 0.90) |
| **Tumour/CSF**  **T1W SI ratio** | 0.76  (0.65 - 0.86) | 0.67  ( 0.50 – 0.83) | 0.85  (0.75 – 0.95) |  | 0.63  (0.53 – 0.74) |
| **Tumour T2/T1**  **SIRatio - WM** | 0.87  (0.79 - 0.94) | 0.55  (0.39 – 0.71) | 0.84  (0.73 – 0.94) |  | 0.77  (0.69 – 0.86) |
| **Tumour T2/T1**  **SIRatio - CSF** | 0.94  (0.89 - 0.98) | 0.51  (0.32 – 0.69) | 0.90  (0.81 – 0.99) |  | 0.81  (0.73 – 0.89) |
